# Supplementary material for: Effectiveness of a Medifast meal replacement program on weight, body composition and cardiometabolic risk factors in overweight and obese adults: a multicenter systematic retrospective chart review study
Source: PubMed Central journal article supplement (PMC4527127; doi:10.1186/s12937-015-0062-8), 2015-08-06
Supplement: 12937_2015_62_MOESM1_ESM.pdf [file 12937_2015_62_MOESM1_ESM.pdf]

### Absolute and Percent Weight Change - 4 & 2 & 1 Plan – Completers Analysis

| <i>Week 0<br/>(Baseline)</i>    | <i>n</i> | <i>kg</i>   |              | <i>Follow-up<br/>Visits</i> | <i>kg</i>   |              | <i>Within Group</i> |                |
|---------------------------------|----------|-------------|--------------|-----------------------------|-------------|--------------|---------------------|----------------|
|                                 |          | <i>mean</i> | <i>stdev</i> |                             | <i>mean</i> | <i>stdev</i> | <i>Z</i>            | <i>P value</i> |
| All Week 0                      | 309      | 109.1       | 21.7         |                             |             |              |                     |                |
| Paired Sample<br>Weeks 0 to 1   | 283      | 108.8       | 21.2         | Week 1                      | 106.1       | 20.6         | -14.483             | <0.0001        |
|                                 |          |             |              | Change: Week 0 to 1         | -2.7        | 1.5          |                     |                |
|                                 |          |             |              | % Change                    | -2.47       | 1.25         |                     |                |
| Paired Sample<br>Weeks 0 to 2   | 280      | 109.1       | 22.1         | Week 2                      | 105.4       | 21.3         | -14.498             | <0.0001        |
|                                 |          |             |              | Change: Week 0 to 2         | -3.7        | 1.9          |                     |                |
|                                 |          |             |              | % Change                    | -3.41       | 1.5          |                     |                |
| Paired Sample<br>Weeks 0 to 4   | 289      | 108.6       | 21.1         | Week 4                      | 103.1       | 19.8         | -14.732             | <0.0001        |
|                                 |          |             |              | Change: Week 0 to 4         | -5.6        | 2.7          |                     |                |
|                                 |          |             |              | % Change                    | -5.08       | 2.13         |                     |                |
| Paired Sample<br>Weeks 0 to 8   | 239      | 108.6       | 21.3         | Week 8                      | 100.3       | 19.7         | -13.402             | <0.0001        |
|                                 |          |             |              | Change: Week 0 to 8         | -8.3        | 4.2          |                     |                |
|                                 |          |             |              | % Change                    | -7.62       | 3.31         |                     |                |
| Paired Sample<br>Weeks 0 to 12* | 185      | 107.6       | 21.1         | Week 12                     | 96.7        | 19.2         | -11.795             | <0.0001        |
|                                 |          |             |              | Change: Week 0 to 12        | -10.9       | 5.6          |                     |                |
|                                 |          |             |              | % Change                    | -10.05      | 4.36         |                     |                |
| Paired Sample<br>Weeks 0 to 16  | 151      | 108.8       | 21.4         | Week 16                     | 95.7        | 19.0         | -10.660             | <0.0001        |
|                                 |          |             |              | Change Week 0 to 16         | -13.1       | 6.6          |                     |                |
|                                 |          |             |              | % Change                    | -11.92      | 4.99         |                     |                |
| Paired Sample<br>Weeks 0 to 20  | 112      | 110.0       | 20.6         | Week 20                     | 95.2        | 18.1         | -9.186              | <0.0001        |
|                                 |          |             |              | Change Week 0 to 20         | -14.7       | 7.4          |                     |                |
|                                 |          |             |              | % Change                    | -13.25      | 5.48         |                     |                |
| Paired Sample<br>Weeks 0 to 24  | 81       | 111.3       | 20.5         | Week 24                     | 95.3        | 18.2         | -7.818              | <0.0001        |
|                                 |          |             |              | Change Week 0 to 24         | -16.0       | 7.9          |                     |                |
|                                 |          |             |              | % Change                    | -14.28      | 5.94         |                     |                |
| Paired Sample<br>Weeks 0 to FV  | 306      | 109.1       | 21.8         | Week FV                     | 98.5        | 20.8         | -15.124             | <0.0001        |
|                                 |          |             |              | Change Week 0 to FV         | -10.6       | 8.5          |                     |                |
|                                 |          |             |              | % Change                    | -9.62       | 6.95         |                     |                |

\*Primary Analysis

Completers included all individuals with weight data at the given visit. Final Visit (FV) represents an individual's last visit to the MWCC while on the 4 & 2 & 1 Plan. Significance levels are for within group changes from baseline body weight using Wilcoxon signed-rank tests.
