# Supplementary material for: Effectiveness of a Medifast meal replacement program on weight, body composition and cardiometabolic risk factors in overweight and obese adults: a multicenter systematic retrospective chart review study
Source: PubMed Central journal article supplement (PMC4527127; doi:10.1186/s12937-015-0062-8), 2015-08-06
Supplement: 12937_2015_62_MOESM2_ESM.pdf [file 12937_2015_62_MOESM2_ESM.pdf]

### Average Weekly Rate of Weight Loss by Time – 4 & 2 &1 Plan

| Time Interval | Rate of Weight Change (kg/week) | 95% CI          |
|---------------|---------------------------------|-----------------|
| 0 to 1 week   | -2.71                           | (-2.87, -2.55)* |
| 0 to 2 weeks  | -1.89                           | (-1.99, -1.79)* |
| 0 to 4 weeks  | -1.36                           | (-1.41, -1.31)* |
| 0 to 8 weeks  | -1.00                           | (-1.03, -0.97)* |
| 0 to 12 weeks | -0.84                           | (-0.86, -0.82)* |
| 0 to 16 weeks | -0.75                           | (-0.77, -0.74)* |
| 0 to 20 weeks | -0.69                           | (-0.70, -0.67)* |
| 0 to 24 weeks | -0.63                           | (-0.65, -0.61)* |

Random effect regression model estimating the association between weight change and time, assessed over different intervals while individuals were on the 4 & 2 &1 Plan; model included baseline weight as a covariate. \*  $p < 0.0001$ .
