# Supplementary material for: Effectiveness of a Medifast meal replacement program on weight, body composition and cardiometabolic risk factors in overweight and obese adults: a multicenter systematic retrospective chart review study
Source: PubMed Central journal article supplement (PMC4527127; doi:10.1186/s12937-015-0062-8), 2015-08-06
Supplement: 12937_2015_62_MOESM3_ESM.pdf [file 12937_2015_62_MOESM3_ESM.pdf]

## Body Weight – Intention-to-Treat Last Observation Carried Forward - 4 & 2 & 1

| <b>Week 0<br/>(Baseline)</b>   | <i>kgs</i> |             |              | <i>Follow-Up Visits</i> |          |             | <i>kg</i>    |          | <i>Within Group Comparison*</i> |  |
|--------------------------------|------------|-------------|--------------|-------------------------|----------|-------------|--------------|----------|---------------------------------|--|
|                                | <i>n</i>   | <i>mean</i> | <i>stdev</i> |                         | <i>n</i> | <i>mean</i> | <i>stdev</i> | <i>Z</i> | <i>P</i>                        |  |
| All Week 0                     | 309        | 109.1       | 21.7         |                         |          |             |              |          |                                 |  |
| Paired Sample<br>Weeks 0 to 1  | 309        | 109.1       | 21.7         | Week 1                  | 309      | 106.6       | 21.3         | -14.483  | <0.0001                         |  |
|                                |            |             |              | Change: Week 0 to 1     | 309      | -2.5        | 1.6          |          |                                 |  |
|                                |            |             |              | % Change                |          | -2.27       | 1.38         |          |                                 |  |
| Paired Sample<br>Weeks 0 to 2  | 309        | 109.1       | 21.7         | Week 2                  | 309      | 105.5       | 20.9         | -15.124  | <0.0001                         |  |
|                                |            |             |              | Change: Week 0 to 2     | 309      | -3.6        | 2.0          |          |                                 |  |
|                                |            |             |              | % Change                |          | -3.29       | 1.55         |          |                                 |  |
| Paired Sample<br>Weeks 0 to 4  | 309        | 109.1       | 21.7         | Week 4                  | 309      | 103.8       | 20.6         | -15.156  | <0.0001                         |  |
|                                |            |             |              | Change: Week 0 to 4     | 309      | -5.3        | 2.8          |          |                                 |  |
|                                |            |             |              | % Change                |          | -4.83       | 2.23         |          |                                 |  |
| Paired Sample<br>Weeks 0 to 8  | 306        | 109.2       | 21.7         | Week 8                  | 306      | 101.8       | 20.4         | -15.067  | <0.0001                         |  |
|                                |            |             |              | Change: Week 0 to 8     | 306      | -7.4        | 4.4          |          |                                 |  |
|                                |            |             |              | % Change                |          | -6.74       | 3.58         |          |                                 |  |
| Paired Sample<br>Weeks 0 to 12 | 281        | 111.1       | 21.3         | Week 12                 | 281      | 102.3       | 20.1         | -14.455  | <0.0001                         |  |
|                                |            |             |              | Change: Week 0 to 12    | 280      | -8.9        | 5.6          |          |                                 |  |
|                                |            |             |              | % Change                |          | -7.94       | 4.66         |          |                                 |  |
| Paired Sample<br>Weeks 0 to 16 | 235        | 114.6       | 20.5         | Week 16                 | 235      | 104.3       | 19.6         | -13.218  | <0.0001                         |  |
|                                |            |             |              | Change Week 0 to 16     | 235      | -10.3       | 7.0          |          |                                 |  |
|                                |            |             |              | % Change                |          | -8.95       | 5.74         |          |                                 |  |
| Paired Sample<br>Weeks 0 to 20 | 201        | 117.3       | 19.9         | Week 20                 | 201      | 106.4       | 19.4         | -12.218  | <0.0001                         |  |
|                                |            |             |              | Change Week 0 to 20     | 201      | -10.8       | 7.8          |          |                                 |  |
|                                |            |             |              | % Change                |          | -9.22       | 6.35         |          |                                 |  |
| Paired Sample<br>Weeks 0 to 24 | 157        | 121.2       | 19.4         | Week 24                 | 157      | 109.7       | 19.0         | -10.801  | <0.0001                         |  |
|                                |            |             |              | Change Week 0 to 24     | 157      | -11.5       | 8.6          |          |                                 |  |
|                                |            |             |              | % Change                |          | -9.39       | 6.81         |          |                                 |  |
| Paired Sample<br>Weeks 0 to FV | 306        | 109.1       | 21.8         | Week FV                 | 306      | 98.5        | 20.8         | -15.124  | <0.0001                         |  |
|                                |            |             |              | Change Week 0 to FV     | 306      | -10.6       | 8.5          |          |                                 |  |
|                                |            |             |              | % Change                |          | -9.62       | 6.95         |          |                                 |  |

Mean absolute and percent change from baseline weight for the intention-to-treat last observation carried forward analyses. If missing, imputed data were carried through from the last measured observation to each individual's last prescribed week of weight loss. Final Visit represents an individual's last visit to the MWCC while on the 4 & 2 & 1 Plan. Significance levels were calculated based on within group changes from baseline body weight using Wilcoxon signed-rank tests.
