# Supplementary material for: Effectiveness of a Medifast meal replacement program on weight, body composition and cardiometabolic risk factors in overweight and obese adults: a multicenter systematic retrospective chart review study
Source: PubMed Central journal article supplement (PMC4527127; doi:10.1186/s12937-015-0062-8), 2015-08-06
Supplement: 12937_2015_62_MOESM4_ESM.pdf [file 12937_2015_62_MOESM4_ESM.pdf]

**Percent Achieving Specified Weight Loss – ITT LOCF**

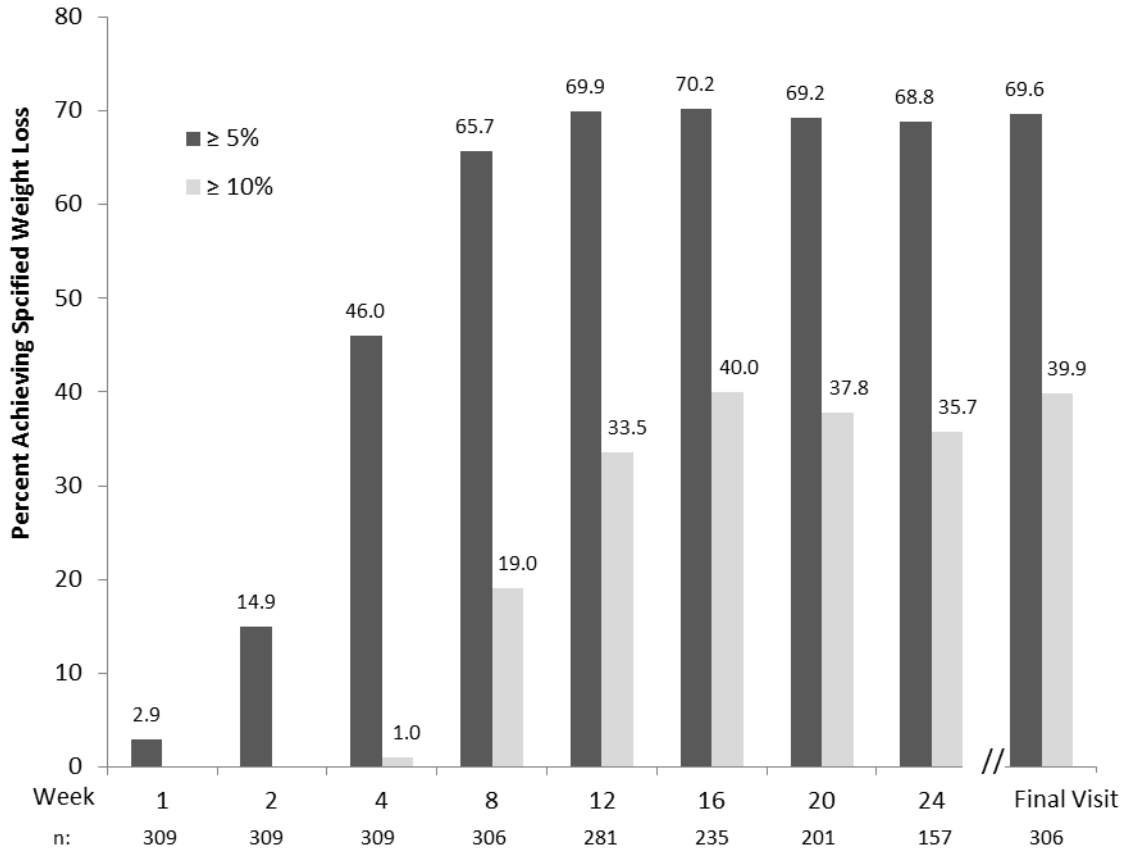

Intention-to-Treat Last Observation Carried Forward (ITT LOCF) values are shown; sample sizes are designated below the graph. Final Visit represents an individual’s last visit to the MWCC while on the 4 & 2 & 1 Plan.
