# Supplementary material for: Effectiveness of a Medifast meal replacement program on weight, body composition and cardiometabolic risk factors in overweight and obese adults: a multicenter systematic retrospective chart review study
Source: PubMed Central journal article supplement (PMC4527127; doi:10.1186/s12937-015-0062-8), 2015-08-06
Supplement: 12937_2015_62_MOESM5_ESM.pdf [file 12937_2015_62_MOESM5_ESM.pdf]

### Change from Baseline Body Weight (SD) for Completers by Gender

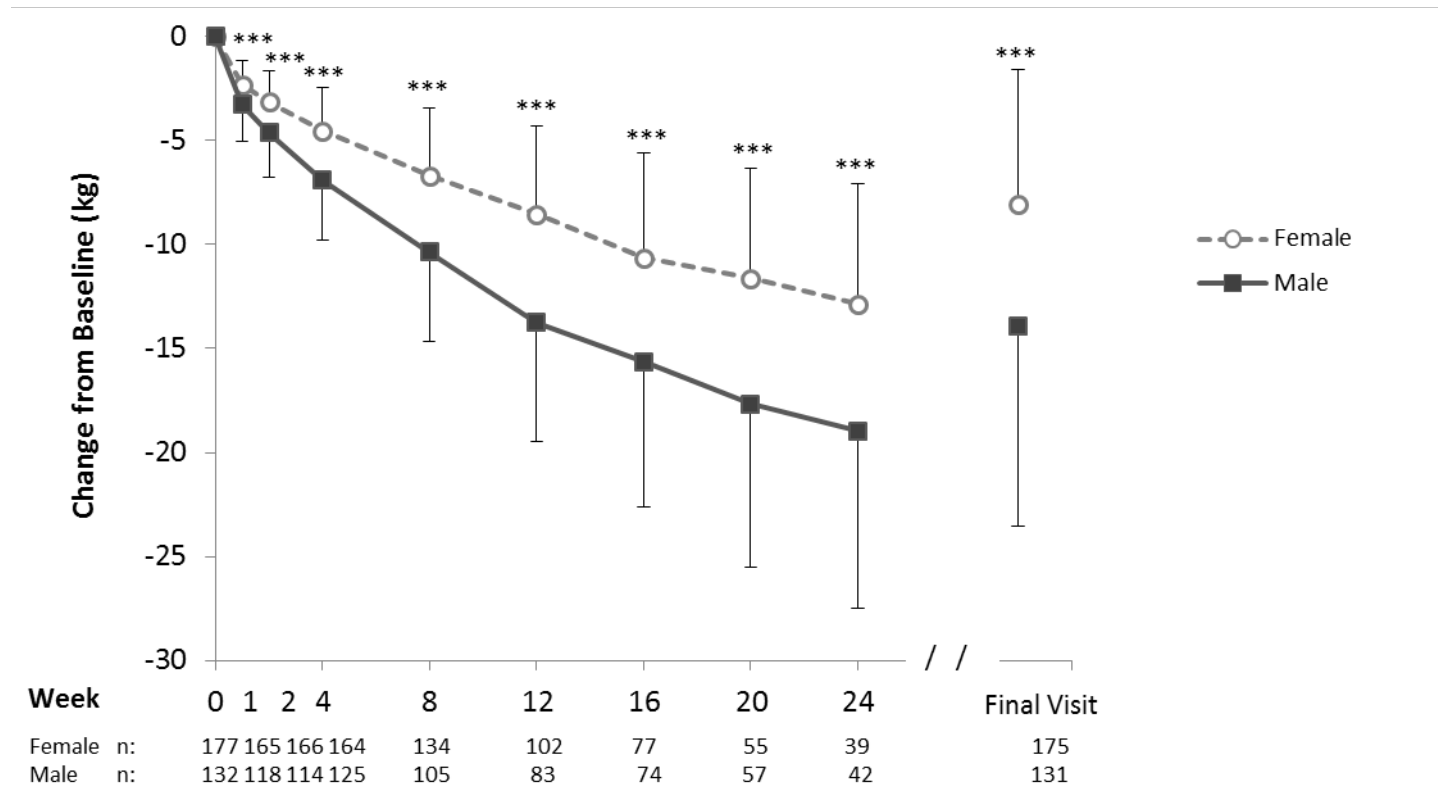

Mean ( $\pm$ SD) change from baseline body weight by gender for the Completers population which included all individuals with weight data at the given visit; sample sizes are designated below the graph. Final Visit represents an individual's last visit to the MWCC while on the 4 & 2 & 1 Plan. Significance level for within group changes from baseline were  $p < 0.0001$  for males and  $p \leq 0.001$  for females. Significance levels for between group comparisons using bivariate t-tests at each time point are shown: \*\*\* $p < 0.0001$ .

### Change from Baseline Lean Body Mass and Fat Mass (SD) for Completers by Gender

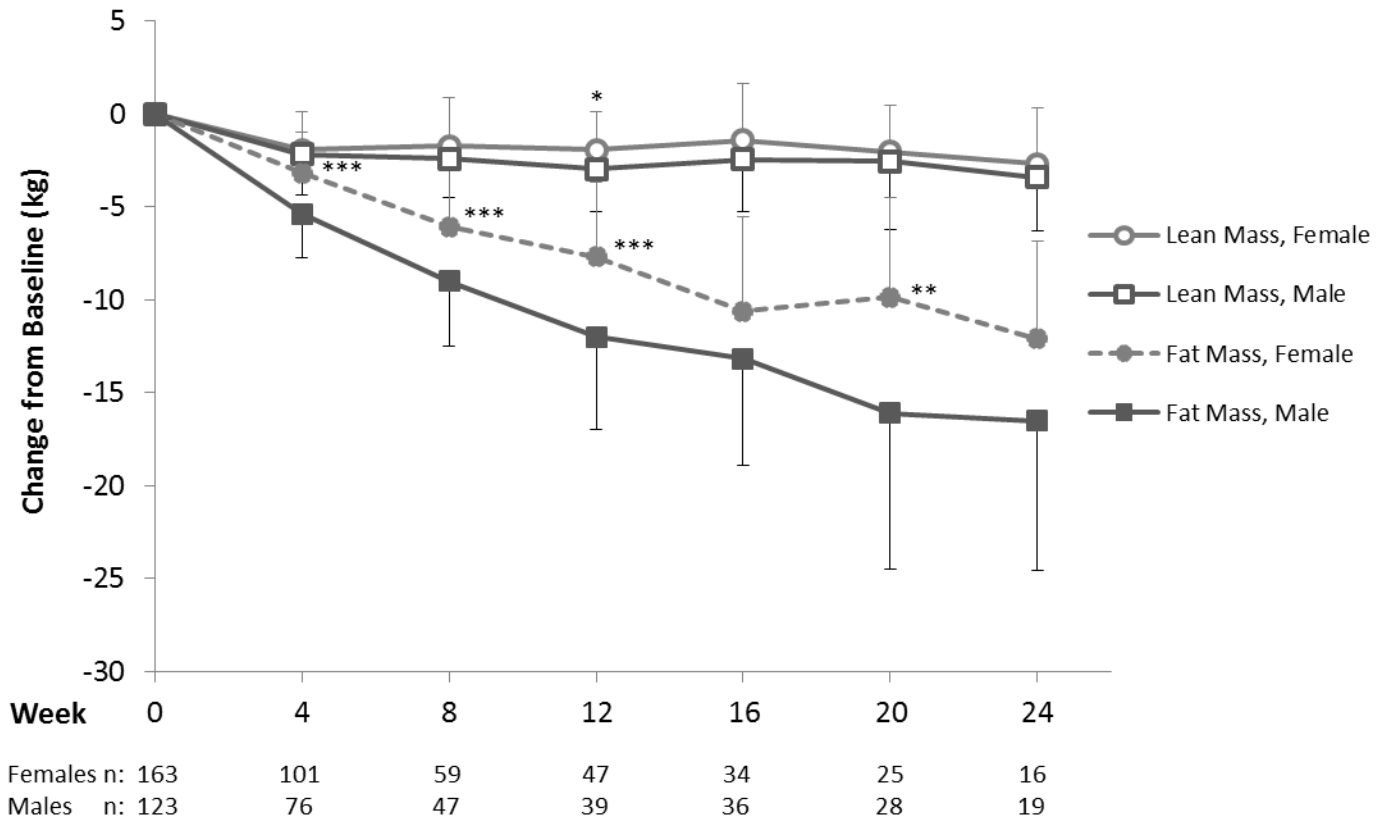

Mean ( $\pm$ SD) change from baseline lean body mass and body fat mass for Completers by gender. The Completers population included all individuals with weight data at the given visit; sample sizes are designated below the graph. Significance level for all within group changes from baseline were  $p < 0.0001$  for fat mass and  $p < 0.01$  for lean mass in both genders at all time points. Significance levels for between group comparisons using bivariate t-tests at each time point are shown: \* $p < 0.05$ ; \*\* $p < 0.01$ ; \*\*\* $p < 0.0001$ .
